# Supplementary material for: Robust inflammatory breast cancer gene signature using nonparametric random forest analysis
Source: Springer Nature journal article supplement (doi:10.1186/s13058-021-01467-y), 2021-09-27
Supplement: MOESM1 [file 19702278]

## SUPPLEMENTARY METHODS

### Genes Signature identification, validation, and comparison with other IBC signatures

To identify an IBC specific signature, 12 IBC and 12 non-IBC samples (see Fig. 1a, left) were classified in an ensemble of 5000 decision trees based bagging, using probed genes as predictors. This approach was looped through a random forest (RF) training model, removing genes with zero or negative predictor importance in each iteration (predictor importance computed for every tree, then averaged over the entire ensemble and divided by the standard deviation over the entire ensemble), until all genes left had a positive predictor importance and low out-of-bag error (Fig. 1a, middle). This yielded a potential IBC-specific signature of 59 unique genes (Additional file 1: Table S1), that could be used to discriminate IBC from non-IBC patient samples (Fig. 1a, right). Using the 24 samples and G59 to create a RF model, for each sample in GSE45581 dataset, the probability of it being an IBC sample (IBC probability score) was computed from fractions of observations of the class per tree leaf, averaged across all trees in the ensemble. Similarly, for each dataset, GSE5847 and GSE111477, half of the samples for each class were used for training, and the resultant tree ensemble model applied for IBC probability scoring for all samples. To compute the accuracy of previous IBC signatures(1-5), the aforementioned analysis was repeated using the respective signature genes. To score TCGA dataset, raw data was downloaded from cBioPortal TCGA Firehose Legacy ([https://www.cbioportal.org/study/summary?id=brca\\_tcga](https://www.cbioportal.org/study/summary?id=brca_tcga) ). mRNA expression was combined with GSE45581 dataset through quantile normalization. Using the quantile normalized IBC and non-IBC GSE45581 samples, a RF model was trained and used to score the TCGA samples. MatSurv(6) was used to plot the overall survival KM-plot and compute the log-rank test.

## **PAM50 subtyping and ROR scores**

PAM50 molecular subtyping (Luminal A, Luminal B, HER2-enriched, Basal-like, and Normal-like) and Risk of recurrence (ROR)(7) were computed using Bioconductor package *GeneFu*(8).

## **Gene ontology and pathway analysis**

The IBC signature genes (Additional file 1: Table S1) were subjected to Gene Ontology and Pathway analysis scoring using the Enrichr web-based application(9). Cellular components and pathways list were ranked using *p*-values for the significance of overlap in Additional file 1: Table S3 and Table S4, respectively.

## **REFERENCES**

- (1) Bertucci F, Finetti P, Rougemont J, Charafe-Jauffret E, Nasser V, Loriod B, et al. Gene expression profiling for molecular characterization of inflammatory breast cancer and prediction of response to chemotherapy. *Cancer Res* 2004 -12-01;64(23):8558-8565.
- (2) Van Laere S, Van der Auwera I, Van den Eynden, Gert G., Fox SB, Bianchi F, Harris AL, et al. Distinct molecular signature of inflammatory breast cancer by cDNA microarray analysis. *Breast Cancer Res Treat* 2005 -10;93(3):237-246.
- (3) Van Laere SJ, Ueno NT, Finetti P, Vermeulen P, Lucci A, Robertson FM, et al. Uncovering the molecular secrets of inflammatory breast cancer biology: an integrated analysis of three distinct affymetrix gene expression datasets. *Clin Cancer Res* 2013 -09-01;19(17):4685-4696.
- (4) Woodward WA, Krishnamurthy S, Yamauchi H, El-Zein R, Ogura D, Kitadai E, et al. Genomic and expression analysis of microdissected inflammatory breast cancer. *Breast Cancer Res Treat* 2013 -04;138(3):761-772.
- (5) Lerebours F, Vacher S, Guinebretiere JM, Rondeau S, Caly M, Gentien D, et al. Hemoglobin overexpression and splice signature as new features of inflammatory breast cancer? *J Adv Res* 2021 -02;28:77-85.
- (6) Creed JH, Gerke TA, Berglund AE. MatSurv: Survival analysis and visualization in MATLAB. *Journal of Open Source Software* 2020 /02/13;5(46):1830.

(7) Parker JS, Mullins M, Cheang MCU, Leung S, Voduc D, Vickery T, et al. Supervised risk predictor of breast cancer based on intrinsic subtypes. *J Clin Oncol* 2009 -03-10;27(8):1160-1167.

(8) Gendoo DMA, Ratanasirigulchai N, Schröder MS, Paré L, Parker JS, Prat A, et al. Genefu: an R/Bioconductor package for computation of gene expression-based signatures in breast cancer. *Bioinformatics* 2016 -04-01;32(7):1097-1099.

(9) Kuleshov MV, Jones MR, Rouillard AD, Fernandez NF, Duan Q, Wang Z, et al. Enrichr: a comprehensive gene set enrichment analysis web server 2016 update. *Nucleic Acids Res* 2016 July 08;44(W1):90.

**Table S1. Gene information for the G59 IBC signature**

Gene information of G59, including gene symbol, gene type, gene location, and protein name.

| IBC-specific genes signature. Original GPL6480 Gene Symbol, current official Gene Symbol, Entrez gene ID (hyperlinked to respective NCBI webpage), UniProt Protein Name and Gene Information is provided. Highlighted in yellow are genes whose current Gene symbol is different from previous GPL6480 Gene symbol. Highlighted in cyan are genes overlapping with Woodward <i>et al</i> 132 gene signature . |                     |                           |                                                                    |                                                                                                                                                                                                |
|---------------------------------------------------------------------------------------------------------------------------------------------------------------------------------------------------------------------------------------------------------------------------------------------------------------------------------------------------------------------------------------------------------------|---------------------|---------------------------|--------------------------------------------------------------------|------------------------------------------------------------------------------------------------------------------------------------------------------------------------------------------------|
| GPL6480 Gene Symbol                                                                                                                                                                                                                                                                                                                                                                                           | Current Gene Symbol | Entrez Gene ID            | UniProt Protein Name                                               | Gene Info                                                                                                                                                                                      |
| LYZL1                                                                                                                                                                                                                                                                                                                                                                                                         | LYZL1               | <a href="#">84569</a>     | Lysozyme-like protein 1                                            | 84569 [Gene Symbol: LYZL1] [Locus Tag: ] [Chromosome: 10] [Map Location: 10p12.1-p11.23] [Description: lysozyme like 1] [Gene Type: protein-coding]                                            |
| PCDH17                                                                                                                                                                                                                                                                                                                                                                                                        | PCDH17              | <a href="#">27253</a>     | Protocadherin-17                                                   | 27253 [Gene Symbol: PCDH17] [Locus Tag: ] [Chromosome: 13] [Map Location: 13q21.1] [Description: protocadherin 17] [Gene Type: protein-coding]                                                 |
| CBY3                                                                                                                                                                                                                                                                                                                                                                                                          | CBY3                | <a href="#">646019</a>    | Protein chibby homolog 3                                           | 646019 [Gene Symbol: CBY3] [Locus Tag: ] [Chromosome: 5] [Map Location: 5q35.3] [Description: chibby family member 3] [Gene Type: protein-coding]                                              |
| LOC100506670                                                                                                                                                                                                                                                                                                                                                                                                  | LOC100506670        | <a href="#">100506670</a> | -                                                                  | -uncharacterized                                                                                                                                                                               |
| HECW1                                                                                                                                                                                                                                                                                                                                                                                                         | HECW1               | <a href="#">23072</a>     | E3 ubiquitin-protein ligase HECW1                                  | 23072 [Gene Symbol: HECW1] [Locus Tag: ] [Chromosome: 7] [Map Location: 7p14.1-p13] [Description: HECT, C2 and WW domain containing E3 ubiquitin protein ligase 1] [Gene Type: protein-coding] |
| LOC100507642                                                                                                                                                                                                                                                                                                                                                                                                  | LOC100507642        | <a href="#">100507642</a> | -                                                                  | 100507642 [Gene Symbol: LOC100507642] [Locus Tag: ] [Chromosome: 7] [Map Location: 7p22.3] [Description: uncharacterized LOC100507642] [Gene Type: ncRNA]                                      |
| <b>HIST1H4A</b>                                                                                                                                                                                                                                                                                                                                                                                               | <b>H4C1</b>         | <a href="#">8359</a>      | Histone H4                                                         | 8359 [Gene Symbol: H4C1] [Locus Tag: ] [Chromosome: 6] [Map Location: 6p22.2] [Description: H4 clustered histone 1] [Gene Type: protein-coding]                                                |
| TIMD4                                                                                                                                                                                                                                                                                                                                                                                                         | TIMD4               | <a href="#">91937</a>     | T-cell immunoglobulin and mucin domain-containing protein 4        | 91937 [Gene Symbol: TIMD4] [Locus Tag: ] [Chromosome: 5] [Map Location: 5q33.3] [Description: T cell immunoglobulin and mucin domain containing 4] [Gene Type: protein-coding]                 |
| LILRA3                                                                                                                                                                                                                                                                                                                                                                                                        | LILRA3              | <a href="#">11026</a>     | Leukocyte immunoglobulin-like receptor subfamily A member 3        | 11026 [Gene Symbol: LILRA3] [Locus Tag: ] [Chromosome: 19] [Map Location: 19q13.4] [Description: leukocyte immunoglobulin like receptor A3] [Gene Type: protein-coding]                        |
| <b>FAM106CP</b>                                                                                                                                                                                                                                                                                                                                                                                               | <b>FAM106C</b>      | <a href="#">100129396</a> | Protein FAM106C                                                    | 100129396 [Gene Symbol: FAM106C] [Locus Tag: ] [Chromosome: 17] [Map Location: 17p11.2] [Description: family with sequence similarity 106 member C] [Gene Type: ncRNA]                         |
| CCDC144A                                                                                                                                                                                                                                                                                                                                                                                                      | CCDC144A            | <a href="#">9720</a>      | Coiled-coil domain-containing protein 144A                         | 9720 [Gene Symbol: CCDC144A] [Locus Tag: ] [Chromosome: 17] [Map Location: 17p11.2] [Description: coiled-coil domain containing 144A] [Gene Type: protein-coding]                              |
| CCDC144NL                                                                                                                                                                                                                                                                                                                                                                                                     | CCDC144NL           | <a href="#">339184</a>    | Putative coiled-coil domain-containing protein 144 N-terminal-like | 339184 [Gene Symbol: CCDC144NL] [Locus Tag: ] [Chromosome: 17] [Map Location: 17p11.2] [Description: CCDC144A N-terminal pseudogene] [Gene Type: pseudo]                                       |
| LOC100130741                                                                                                                                                                                                                                                                                                                                                                                                  | LOC100130741        | <a href="#">100130741</a> | -                                                                  | -uncharacterized                                                                                                                                                                               |
| PPBP                                                                                                                                                                                                                                                                                                                                                                                                          | PPBP                | <a href="#">5473</a>      | Platelet basic protein                                             | 5473 [Gene Symbol: PPBP] [Locus Tag: ] [Chromosome: 4] [Map Location: 4q13.3] [Description: pro-platelet basic protein] [Gene Type: protein-coding]                                            |
| CCDC62                                                                                                                                                                                                                                                                                                                                                                                                        | CCDC62              | <a href="#">84660</a>     | Coiled-coil domain-containing protein 62                           | 84660 [Gene Symbol: CCDC62] [Locus Tag: ] [Chromosome: 12] [Map Location: 12q24.31] [Description: coiled-coil domain containing 62] [Gene Type: protein-coding]                                |
| UNC93A                                                                                                                                                                                                                                                                                                                                                                                                        | UNC93A              | <a href="#">54346</a>     | Protein unc-93 homolog A                                           | 54346 [Gene Symbol: UNC93A] [Locus Tag: ] [Chromosome: 6] [Map Location: 6q27] [Description: unc-93 homolog A] [Gene Type: protein-coding]                                                     |
| TRPV3                                                                                                                                                                                                                                                                                                                                                                                                         | TRPV3               | <a href="#">162514</a>    | Transient receptor potential cation channel subfamily V member 3   | 162514 [Gene Symbol: TRPV3] [Locus Tag: ] [Chromosome: 17] [Map Location: 17p13.2] [Description: transient receptor potential cation channel subfamily V member 3] [Gene Type: protein-coding] |
| CENPT                                                                                                                                                                                                                                                                                                                                                                                                         | CENPT               | <a href="#">80152</a>     | Centromere protein T                                               | 80152 [Gene Symbol: CENPT] [Locus Tag: ] [Chromosome: 16] [Map Location: 16q22.1] [Description: centromere protein T] [Gene Type: protein-coding]                                              |
| ZCCHC13                                                                                                                                                                                                                                                                                                                                                                                                       | ZCCHC13             | <a href="#">389874</a>    | Zinc finger CCHC domain-containing protein 13                      | 389874 [Gene Symbol: ZCCHC13] [Locus Tag: ] [Chromosome: X] [Map Location: Xq13.2] [Description: zinc finger CCHC-type containing 13] [Gene Type: protein-coding]                              |
| <b>LOC100129858</b>                                                                                                                                                                                                                                                                                                                                                                                           | <b>SCOC-AS1</b>     | <a href="#">100129858</a> | -                                                                  | -uncharacterized                                                                                                                                                                               |
| SLC22A7                                                                                                                                                                                                                                                                                                                                                                                                       | SLC22A7             | <a href="#">10864</a>     | Solute carrier family 22 member 7                                  | 10864 [Gene Symbol: SLC22A7] [Locus Tag: ] [Chromosome: 6] [Map Location: 6p21.1] [Description: solute carrier family 22 member 7] [Gene Type: protein-coding]                                 |
| <b>C1orf95</b>                                                                                                                                                                                                                                                                                                                                                                                                | <b>STUM</b>         | <a href="#">375057</a>    | Protein stum homolog                                               | 375057 [Gene Symbol: STUM] [Locus Tag: ] [Chromosome: 1] [Map Location: 1q42.12] [Description: stum, mechanosensory transduction mediator homolog] [Gene Type: protein-coding]                 |
| GPR75                                                                                                                                                                                                                                                                                                                                                                                                         | GPR75               | <a href="#">10936</a>     | Probable G-protein coupled receptor 75                             | 10936 [Gene Symbol: GPR75] [Locus Tag: ] [Chromosome: 2] [Map Location: 2p16.2] [Description: G protein-coupled receptor 75] [Gene Type: protein-coding]                                       |
| ASGR1                                                                                                                                                                                                                                                                                                                                                                                                         | ASGR1               | <a href="#">432</a>       | Asialoglycoprotein receptor 1                                      | 432 [Gene Symbol: ASGR1] [Locus Tag: ] [Chromosome: 17] [Map Location: 17p13.1] [Description: asialoglycoprotein receptor 1] [Gene Type: protein-coding]                                       |
| S1PR1                                                                                                                                                                                                                                                                                                                                                                                                         | S1PR1               | <a href="#">1901</a>      | Sphingosine 1-phosphate receptor 1                                 | 1901 [Gene Symbol: S1PR1] [Locus Tag: ] [Chromosome: 1] [Map Location: 1p21.2] [Description: sphingosine-1-phosphate receptor 1] [Gene Type: protein-coding]                                   |
| FAM162B                                                                                                                                                                                                                                                                                                                                                                                                       | FAM162B             | <a href="#">221303</a>    | Protein FAM162B                                                    | 221303 [Gene Symbol: FAM162B] [Locus Tag: ] [Chromosome: 6] [Map Location: 6q22.1] [Description: family with sequence similarity 162 member B] [Gene Type: protein-coding]                     |
| CDH5                                                                                                                                                                                                                                                                                                                                                                                                          | CDH5                | <a href="#">1003</a>      | Cadherin-5                                                         | 1003 [Gene Symbol: CDH5] [Locus Tag: ] [Chromosome: 16] [Map Location: 16q21] [Description: cadherin 5] [Gene Type: protein-coding]                                                            |
| VWF                                                                                                                                                                                                                                                                                                                                                                                                           | VWF                 | <a href="#">7450</a>      | von Willebrand factor                                              | 7450 [Gene Symbol: VWF] [Locus Tag: ] [Chromosome: 12] [Map Location: 12p13.31] [Description: von Willebrand factor] [Gene Type: protein-coding]                                               |
| <b>GPR116</b>                                                                                                                                                                                                                                                                                                                                                                                                 | <b>ADGRF5</b>       | <a href="#">221395</a>    | Adhesion G protein-coupled receptor F5                             | 221395 [Gene Symbol: ADGRF5] [Locus Tag: ] [Chromosome: 6] [Map Location: 6p12.3] [Description: adhesion G protein-coupled receptor F5] [Gene Type: protein-coding]                            |
| ABCC9                                                                                                                                                                                                                                                                                                                                                                                                         | ABCC9               | <a href="#">10060</a>     | ATP-binding cassette sub-family C member 9                         | 10060 [Gene Symbol: ABCC9] [Locus Tag: ] [Chromosome: 12] [Map Location: 12p12.1] [Description: ATP binding cassette subfamily C member 9] [Gene Type: protein-coding]                         |

|              |              |           |                                                                                                                                 |                                                                                                                                                                                                        |
|--------------|--------------|-----------|---------------------------------------------------------------------------------------------------------------------------------|--------------------------------------------------------------------------------------------------------------------------------------------------------------------------------------------------------|
| ACVRL1       | ACVRL1       | 94        | Serine/threonine-protein kinase receptor; Receptor protein serine/threonine kinase; Serine/threonine-protein kinase receptor R3 | 94 [Gene Symbol: ACVRL1] [Locus Tag: ] [Chromosome: 12] [Map Location: 12q13.13] [Description: activin A receptor like type 1] [Gene Type: protein-coding]                                             |
| SLCO3A1      | SLCO3A1      | 28232     | Solute carrier organic anion transporter family member 3A1                                                                      | 28232 [Gene Symbol: SLCO3A1] [Locus Tag: ] [Chromosome: 15] [Map Location: 15q26.1] [Description: solute carrier organic anion transporter family member 3A1] [Gene Type: protein-coding]              |
| C17orf100    | C17orf100    | 388327    | Uncharacterized protein C17orf100                                                                                               | 388327 [Gene Symbol: C17orf100] [Locus Tag: ] [Chromosome: 17] [Map Location: 17p13.1] [Description: chromosome 17 open reading frame 100] [Gene Type: protein-coding]                                 |
| ENPEP        | ENPEP        | 2028      | Aminopeptidase; Glutamyl aminopeptidase                                                                                         | 2028 [Gene Symbol: ENPEP] [Locus Tag: ] [Chromosome: 4] [Map Location: 4q25] [Description: glutamyl aminopeptidase] [Gene Type: protein-coding]                                                        |
| FOLH1        | FOLH1        | 2346      | Glutamate carboxypeptidase 2                                                                                                    | 2346 [Gene Symbol: FOLH1] [Locus Tag: ] [Chromosome: 11] [Map Location: 11p11.12] [Description: folate hydrolase 1] [Gene Type: protein-coding]                                                        |
| ART3         | ART3         | 419       | Ecto-ADP-ribosyltransferase 3; NAD(P)(+)-arginine ADP-ribosyltransferase                                                        | 419 [Gene Symbol: ART3] [Locus Tag: ] [Chromosome: 4] [Map Location: 4q21.1] [4p15.1-p14] [Description: ADP-ribosyltransferase 3 (inactive)] [Gene Type: protein-coding]                               |
| TGFA         | TGFA         | 7039      | Protransforming growth factor alpha                                                                                             | 7039 [Gene Symbol: TGFA] [Locus Tag: ] [Chromosome: 2] [Map Location: 2p13.3] [Description: transforming growth factor alpha] [Gene Type: protein-coding]                                              |
| SPNS2        | SPNS2        | 124976    | Protein spinster homolog 2                                                                                                      | 124976 [Gene Symbol: SPNS2] [Locus Tag: ] [Chromosome: 17] [Map Location: 17p13.2] [Description: sphingolipid transporter 2] [Gene Type: protein-coding]                                               |
| NXN          | NXN          | 64359     | Nucleoredoxin                                                                                                                   | 64359 [Gene Symbol: NXN] [Locus Tag: ] [Chromosome: 17] [Map Location: 17p13.3] [Description: nucleoredoxin] [Gene Type: protein-coding]                                                               |
| PTGER3       | PTGER3       | 5733      | Prostaglandin E2 receptor EP3 subtype                                                                                           | 5733 [Gene Symbol: PTGER3] [Locus Tag: ] [Chromosome: 1] [Map Location: 1p31.1] [Description: prostaglandin E receptor 3] [Gene Type: protein-coding]                                                  |
| NXNL2        | NXNL2        | 158046    | Nucleoredoxin-like protein 2                                                                                                    | 158046 [Gene Symbol: NXNL2] [Locus Tag: ] [Chromosome: 9] [Map Location: 9q22.1] [Description: nucleoredoxin like 2] [Gene Type: protein-coding]                                                       |
| PREX1        | PREX1        | 57580     | Phosphatidylinositol 3,4,5-trisphosphate-dependent Rac exchanger 1 protein                                                      | 57580 [Gene Symbol: PREX1] [Locus Tag: ] [Chromosome: 20] [Map Location: 20q13.13] [Description: phosphatidylinositol-3,4,5-trisphosphate dependent Rac exchange factor 1] [Gene Type: protein-coding] |
| MRPS30       | MRPS30       | 10884     | 39S ribosomal protein S30, mitochondrial                                                                                        | 10884 [Gene Symbol: MRPS30] [Locus Tag: ] [Chromosome: 5] [Map Location: 5p12] [Description: mitochondrial ribosomal protein S30] [Gene Type: protein-coding]                                          |
| WDR65        | CFAP57       | 149465    | Cilia- and flagella-associated protein 57                                                                                       | 149465 [Gene Symbol: CFAP57] [Locus Tag: ] [Chromosome: 1] [Map Location: 1p34.2] [Description: cilia and flagella associated protein 57] [Gene Type: protein-coding]                                  |
| FLT3         | FLT3         | 2322      | Receptor-type tyrosine-protein kinase FLT3; Receptor protein-tyrosine kinase                                                    | 2322 [Gene Symbol: FLT3] [Locus Tag: ] [Chromosome: 13] [Map Location: 13q12.2] [Description: fms related receptor tyrosine kinase 3] [Gene Type: protein-coding]                                      |
| SEMA3E       | SEMA3E       | 9723      | Semaphorin-3E                                                                                                                   | 9723 [Gene Symbol: SEMA3E] [Locus Tag: ] [Chromosome: 7] [Map Location: 7q21.11] [Description: semaphorin 3E] [Gene Type: protein-coding]                                                              |
| CCDC71       | CCDC71       | 64925     | Coiled-coil domain-containing protein 71                                                                                        | 64925 [Gene Symbol: CCDC71] [Locus Tag: ] [Chromosome: 3] [Map Location: 3p21.31] [Description: coiled-coil domain containing 71] [Gene Type: protein-coding]                                          |
| GRK4         | GRK4         | 2868      | G protein-coupled receptor kinase 4                                                                                             | 2868 [Gene Symbol: GRK4] [Locus Tag: ] [Chromosome: 4] [Map Location: 4p16.3] [Description: G protein-coupled receptor kinase 4] [Gene Type: protein-coding]                                           |
| CROT         | CROT         | 54677     | Peroxisomal carnitine O-octanoyltransferase                                                                                     | 54677 [Gene Symbol: CROT] [Locus Tag: ] [Chromosome: 7] [Map Location: 7q21.12] [Description: carnitine O-octanoyltransferase] [Gene Type: protein-coding]                                             |
| LOC100507508 | LOC100507508 | 100507508 | -                                                                                                                               | -uncharacterized                                                                                                                                                                                       |
| MORN4        | MORN4        | 118812    | MORN repeat-containing protein 4                                                                                                | 118812 [Gene Symbol: MORN4] [Locus Tag: ] [Chromosome: 10] [Map Location: 10q24.2] [Description: MORN repeat containing 4] [Gene Type: protein-coding]                                                 |
| DUSP1        | DUSP1        | 1843      | Dual specificity protein phosphatase 1                                                                                          | 1843 [Gene Symbol: DUSP1] [Locus Tag: ] [Chromosome: 5] [Map Location: 5q35.1] [Description: dual specificity phosphatase 1] [Gene Type: protein-coding]                                               |
| FOS          | FOS          | 2353      | Cellular oncogene fos; Proto-oncogene c-Fos                                                                                     | 2353 [Gene Symbol: FOS] [Locus Tag: ] [Chromosome: 14] [Map Location: 14q24.3] [Description: Fos proto-oncogene, AP-1 transcription factor subunit] [Gene Type: protein-coding]                        |
| RGS1         | RGS1         | 5996      | Regulator of G-protein signaling 1                                                                                              | 5996 [Gene Symbol: RGS1] [Locus Tag: ] [Chromosome: 1] [Map Location: 1q31.2] [Description: regulator of G protein signaling 1] [Gene Type: protein-coding]                                            |
| C8orf4       | TCIM         | 56892     | Transcriptional and immune response regulator                                                                                   | 56892 [Gene Symbol: TCIM] [Locus Tag: ] [Chromosome: 8] [Map Location: 8p11.21] [Description: transcriptional and immune response regulator] [Gene Type: protein-coding]                               |
| GLYAT        | GLYAT        | 10249     | Glycine N-acyltransferase                                                                                                       | 10249 [Gene Symbol: GLYAT] [Locus Tag: ] [Chromosome: 11] [Map Location: 11q12.1] [Description: glycine-N-acyltransferase] [Gene Type: protein-coding]                                                 |
| PLK5         | PLK5         | 126520    | Inactive serine/threonine-protein kinase PLK5                                                                                   | 126520 [Gene Symbol: PLK5] [Locus Tag: ] [Chromosome: 19] [Map Location: 19p13.3] [Description: polo like kinase 5 (inactive)] [Gene Type: protein-coding]                                             |
| PSPH         | PSPH         | 5723      | Phosphoserine phosphatase O-phosphoserine phosphohydrolase                                                                      | 5723 [Gene Symbol: PSPH] [Locus Tag: ] [Chromosome: 7] [Map Location: 7p11.2] [Description: phosphoserine phosphatase] [Gene Type: protein-coding]                                                     |
| SPATA5L1     | SPATA5L1     | 79029     | Spermatogenesis-associated protein 5-like protein 1                                                                             | 79029 [Gene Symbol: SPATA5L1] [Locus Tag: ] [Chromosome: 15] [Map Location: 15q21.1] [Description: spermatogenesis associated 5 like 1] [Gene Type: protein-coding]                                    |

**Table S2. Distribution of clinical and molecular features in IBC / non-IBC predicted samples**

Samples were dichotomized into predicted IBC and non-IBC samples based on IBC probability score and grouped based on clinical features as well as PAM50 molecular subtyping and subtype based risk of relapse ( see Supp. Methods).  $\chi^2$  distribution p-value was computed for each contingency table.

predicted IBC samples  
 predicted non-IBC samples

|                              |                                              |               |                           |                           |                           |       |                           |
|------------------------------|----------------------------------------------|---------------|---------------------------|---------------------------|---------------------------|-------|---------------------------|
| GSE45581 (discovery dataset) | GSE45581-PAM50 molecular subtyping (n = 40)  |               |                           |                           |                           |       |                           |
|                              |                                              | Normal        | Luminal A                 | Luminal B                 | Her2                      | Basal | $\chi^2$ p-value = 0.2135 |
|                              | Predicted IBC                                | 0             | 2                         | 4                         | 6                         | 8     |                           |
|                              | Predicted non-IBC                            | 0             | 3                         | 9                         | 5                         | 3     |                           |
|                              | GSE45581-ROR score (n = 40)                  |               |                           |                           |                           |       |                           |
|                              |                                              | Low           | Intermediate              | High                      | $\chi^2$ p value = 0.0548 |       |                           |
|                              | Predicted IBC                                | 2             | 0                         | 18                        |                           |       |                           |
|                              | Predicted non-IBC                            | 2             | 5                         | 13                        |                           |       |                           |
|                              | GSE45581-ER score (n = 40)                   |               |                           |                           |                           |       |                           |
|                              |                                              | Low (ER 0-2)  | High (ER 3-5)             | $\chi^2$ p value > 0.9999 |                           |       |                           |
| Predicted IBC                | 8                                            | 12            |                           |                           |                           |       |                           |
| Predicted non-IBC            | 8                                            | 12            |                           |                           |                           |       |                           |
| GSE45581-Her2 score (n = 40) |                                              |               |                           |                           |                           |       |                           |
|                              | Low (ER 0-2)                                 | High (ER 3-5) | $\chi^2$ p value > 0.9999 |                           |                           |       |                           |
| Predicted IBC                | 13                                           | 7             |                           |                           |                           |       |                           |
| Predicted non-IBC            | 12                                           | 8             |                           |                           |                           |       |                           |
| GSE111477                    | GSE111477-PAM50 molecular subtyping (n = 61) |               |                           |                           |                           |       |                           |
|                              |                                              | Normal        | Luminal A                 | Luminal B                 | Her2                      | Basal | $\chi^2$ p value = 0.0057 |
|                              | Predicted IBC                                | 4             | 4                         | 5                         | 13                        | 6     |                           |
|                              | Predicted non-IBC                            | 2             | 12                        | 10                        | 4                         | 1     |                           |
|                              | GSE111477-ROR score (n = 61)                 |               |                           |                           |                           |       |                           |
|                              | Low                                          | Intermediate  | High                      | $\chi^2$ p value = 0.0182 |                           |       |                           |
| Predicted IBC                | 5                                            | 12            | 15                        |                           |                           |       |                           |
| Predicted non-IBC            | 14                                           | 5             | 10                        |                           |                           |       |                           |

**Table S3. Cellular component for the G59 IBC signature**

Cellular components list with rows ranked using p-values for the significance of overlap.

| Cellular component Gene Ontology analysis                                  |         |          |                  |             |                      |            |                |                                               |
|----------------------------------------------------------------------------|---------|----------|------------------|-------------|----------------------|------------|----------------|-----------------------------------------------|
| Term                                                                       | Overlap | P-value  | Adjusted P-value | Old P-value | Old Adjusted P-value | Odds Ratio | Combined Score | Genes                                         |
| integral component of plasma membrane (GO:0005887)                         | 13/1463 | 1.30E-04 | 0.005706         | 0           | 0                    | 3.94803    | 35.33668       | ACVRL1;ENPEP;FLT3;PTGER3;GPR75;TGFA;TRPV3;ABC |
| platelet alpha granule lumen (GO:0031093)                                  | 2/67    | 0.014645 | 0.237796         | 0           | 0                    | 11.54136   | 48.74701       | C9;ASGR1;PCDH17;ART3;SLCO3A1;SLC22A7          |
| cytoplasmic vesicle (GO:0031410)                                           | 3/215   | 0.021339 | 0.237796         | 0           | 0                    | 5.370011   | 20.65972       | VWF;PPBP                                      |
| platelet alpha granule (GO:0031091)                                        | 2/90    | 0.025485 | 0.237796         | 0           | 0                    | 8.515009   | 31.24726       | ENPEP;ADGRF5;TGFA                             |
| filopodium tip (GO:0032433)                                                | 1/10    | 0.027168 | 0.237796         | 0           | 0                    | 41.02058   | 147.9085       | VWF;PPBP                                      |
| nuclear nucleosome (GO:0000788)                                            | 1/13    | 0.035176 | 0.237796         | 0           | 0                    | 30.7608    | 102.9683       | MORN4                                         |
| potassium channel complex (GO:0034705)                                     | 1/14    | 0.037831 | 0.237796         | 0           | 0                    | 28.39316   | 92.97685       | CENPT                                         |
| catenin complex (GO:0016342)                                               | 1/28    | 0.074256 | 0.338307         | 0           | 0                    | 13.66118   | 35.52223       | ABCC9                                         |
| tertiary granule (GO:0070820)                                              | 2/164   | 0.074852 | 0.338307         | 0           | 0                    | 4.608199   | 11.94557       | CDH5                                          |
| peroxisomal matrix (GO:0005782)                                            | 1/42    | 0.109327 | 0.338307         | 0           | 0                    | 8.990063   | 19.89874       | PPBP;LILRA3                                   |
| microbody lumen (GO:0031907)                                               | 1/42    | 0.109327 | 0.338307         | 0           | 0                    | 8.990063   | 19.89874       | CROT                                          |
| endoplasmic reticulum-Golgi intermediate compartment membrane (GO:0033116) | 1/47    | 0.121533 | 0.338307         | 0           | 0                    | 8.01087    | 16.88346       | CROT                                          |
| chromosome, centromeric region (GO:0000775)                                | 1/49    | 0.126369 | 0.338307         | 0           | 0                    | 7.676312   | 15.8788        | TGFA                                          |
| lytic vacuole membrane (GO:0098852)                                        | 2/233   | 0.134601 | 0.338307         | 0           | 0                    | 3.220453   | 6.458419       | ENPEP;SPNS2                                   |
| ER to Golgi transport vesicle membrane (GO:0012507)                        | 1/54    | 0.138346 | 0.338307         | 0           | 0                    | 6.950384   | 13.74783       | TGFA                                          |
| tertiary granule lumen (GO:1904724)                                        | 1/55    | 0.140722 | 0.338307         | 0           | 0                    | 6.821331   | 13.37641       | PPBP                                          |
| filopodium (GO:0030175)                                                    | 1/60    | 0.152506 | 0.338307         | 0           | 0                    | 6.241682   | 11.73781       | MORN4                                         |
| ficolin-1-rich granule membrane (GO:0101003)                               | 1/61    | 0.154843 | 0.338307         | 0           | 0                    | 6.137346   | 11.44824       | LILRA3                                        |
| bicellular tight junction (GO:0005923)                                     | 1/72    | 0.180143 | 0.338307         | 0           | 0                    | 5.18362    | 8.884743       | CDH5                                          |
| tertiary granule membrane (GO:0070821)                                     | 1/73    | 0.182406 | 0.338307         | 0           | 0                    | 5.111368   | 8.6971         | LILRA3                                        |
| peroxisomal part (GO:0044439)                                              | 1/75    | 0.186913 | 0.338307         | 0           | 0                    | 4.972723   | 8.339813       | CROT                                          |
| COPII-coated ER to Golgi transport vesicle (GO:0030134)                    | 1/75    | 0.186913 | 0.338307         | 0           | 0                    | 4.972723   | 8.339813       | TGFA                                          |
| chromosomal region (GO:0098687)                                            | 1/76    | 0.189157 | 0.338307         | 0           | 0                    | 4.906173   | 8.16964        | CENPT                                         |
| lysosomal membrane (GO:0005765)                                            | 2/291   | 0.190654 | 0.338307         | 0           | 0                    | 2.56656    | 4.253548       | ENPEP;SPNS2                                   |
| secretory granule lumen (GO:0034774)                                       | 2/317   | 0.216741 | 0.338307         | 0           | 0                    | 2.351602   | 3.595724       | VWF;PPBP                                      |
| specific granule membrane (GO:0035579)                                     | 1/91    | 0.222102 | 0.338307         | 0           | 0                    | 4.085391   | 6.146946       | LILRA3                                        |
| peroxisome (GO:0005777)                                                    | 1/92    | 0.224251 | 0.338307         | 0           | 0                    | 4.040293   | 6.040187       | CROT                                          |
| microbody (GO:0042579)                                                     | 1/92    | 0.224251 | 0.338307         | 0           | 0                    | 4.040293   | 6.040187       | CROT                                          |
| centriole (GO:0005814)                                                     | 1/95    | 0.230664 | 0.338307         | 0           | 0                    | 3.910757   | 5.736279       | CBY3                                          |
| endoplasmic reticulum-Golgi intermediate compartment (GO:0005793)          | 1/95    | 0.230664 | 0.338307         | 0           | 0                    | 3.910757   | 5.736279       | TGFA                                          |
| clathrin-coated vesicle (GO:0030136)                                       | 1/100   | 0.241235 | 0.342398         | 0           | 0                    | 3.712308   | 5.278844       | VWF                                           |
| microtubule organizing center part (GO:0044450)                            | 1/126   | 0.293948 | 0.404179         | 0           | 0                    | 2.936296   | 3.595057       | CBY3                                          |
| lysosome (GO:0005764)                                                      | 2/422   | 0.323735 | 0.431647         | 0           | 0                    | 1.754268   | 1.978516       | ENPEP;SPNS2                                   |
| RNA polymerase II transcription factor complex (GO:0090575)                | 1/147   | 0.333885 | 0.432086         | 0           | 0                    | 2.511289   | 2.75478        | FOS                                           |
| specific granule (GO:0042581)                                              | 1/160   | 0.357487 | 0.449412         | 0           | 0                    | 2.304449   | 2.370485       | LILRA3                                        |
| ficolin-1-rich granule (GO:0101002)                                        | 1/184   | 0.398923 | 0.487572         | 0           | 0                    | 1.999798   | 1.837789       | LILRA3                                        |
| nuclear chromatin (GO:0000790)                                             | 1/253   | 0.50398  | 0.599328         | 0           | 0                    | 1.447163   | 0.991622       | CENPT                                         |
| mitochondrial matrix (GO:0005759)                                          | 1/308   | 0.574611 | 0.665339         | 0           | 0                    | 1.184582   | 0.656332       | GLYT                                          |
| mitochondrial inner membrane (GO:0005743)                                  | 1/341   | 0.612145 | 0.690626         | 0           | 0                    | 1.06781    | 0.524066       | MRPS30                                        |
| perinuclear region of cytoplasm (GO:0048471)                               | 1/378   | 0.65037  | 0.709993         | 0           | 0                    | 0.961195   | 0.413519       | TGFA                                          |
| nuclear chromosome part (GO:0044454)                                       | 1/392   | 0.663847 | 0.709993         | 0           | 0                    | 0.926115   | 0.379433       | CENPT                                         |
| nucleoplasm part (GO:0044451)                                              | 1/407   | 0.677721 | 0.709993         | 0           | 0                    | 0.891215   | 0.3467         | CENPT                                         |
| mitochondrion (GO:0005739)                                                 | 2/1026  | 0.780968 | 0.79913          | 0           | 0                    | 0.697266   | 0.172379       | MRPS30;GLYT                                   |
| nuclear body (GO:0016604)                                                  | 1/618   | 0.822481 | 0.822481         | 0           | 0                    | 0.580107   | 0.11337        | CENPT                                         |

**Table S4. Pathways analysis for the G59 IBC signature**

Pathways analysis list with rows ranked using p-values for the significance of overlap.

| BioPlanet pathway analysis                                                   |         |          |                  |             |                      |            |                |                                              |
|------------------------------------------------------------------------------|---------|----------|------------------|-------------|----------------------|------------|----------------|----------------------------------------------|
| Term                                                                         | Overlap | P-value  | Adjusted P-value | Old P-value | Old Adjusted P-value | Odds Ratio | Combined Score | Genes                                        |
| Small ligand GPCRs                                                           | 2/19    | 0.001232 | 0.117835         | 0           | 0                    | 44.23529   | 296.331566     | PTGER3;S1PR1                                 |
| Interleukin-3 regulation of hematopoietic cells                              | 2/20    | 0.001367 | 0.117835         | 0           | 0                    | 41.77568   | 275.526768     | TGFA;FOS                                     |
| Interleukin-2 signaling pathway                                              | 8/847   | 0.002086 | 0.117835         | 0           | 0                    | 3.876144   | 23.9246098     | PREX1;ENPEP;RGS1;DUSP1;PTGER3;S1PR1;FOS;PPBP |
| G alpha (i) signaling events                                                 | 4/199   | 0.002182 | 0.117835         | 0           | 0                    | 7.94369    | 48.6745734     | RGS1;PTGER3;S1PR1;PPBP                       |
| FOXO1 transcription factor network                                           | 2/41    | 0.005684 | 0.196055         | 0           | 0                    | 19.26076   | 99.5789646     | TGFA;FOS                                     |
| Wnt interactions in lipid metabolism and immune response                     | 2/45    | 0.006815 | 0.196055         | 0           | 0                    | 17.46556   | 87.129734      | DUSP1;FOS                                    |
| Myometrial relaxation and contraction pathways                               | 3/155   | 0.008922 | 0.196055         | 0           | 0                    | 7.512525   | 35.4537037     | RGS1;GRK4;FOS                                |
| ATF2 transcription factor network                                            | 2/59    | 0.011493 | 0.196055         | 0           | 0                    | 13.1665    | 58.8023751     | DUSP1;FOS                                    |
| Chemokine signaling pathway                                                  | 3/189   | 0.015206 | 0.196055         | 0           | 0                    | 6.128722   | 25.6553397     | PREX1;GRK4;PPBP                              |
| G alpha q pathway                                                            | 2/70    | 0.015912 | 0.196055         | 0           | 0                    | 11.03052   | 45.6736747     | RGS1;GRK4                                    |
| AP-1 transcription factor network                                            | 2/70    | 0.015912 | 0.196055         | 0           | 0                    | 11.03052   | 45.6736747     | DUSP1;FOS                                    |
| Beta-oxidation of pristanoyl-CoA                                             | 1/8     | 0.021793 | 0.196055         | 0           | 0                    | 52.74603   | 201.815026     | CROT                                         |
| Lysosphingolipid and lysophosphatidic acid (LPA) G-protein coupled receptors | 1/8     | 0.021793 | 0.196055         | 0           | 0                    | 52.74603   | 201.815026     | S1PR1                                        |
| TSP1-induced apoptosis in microvascular endothelial cell                     | 1/8     | 0.021793 | 0.196055         | 0           | 0                    | 52.74603   | 201.815026     | FOS                                          |
| Response to elevated platelet cytosolic calcium                              | 2/83    | 0.02192  | 0.196055         | 0           | 0                    | 9.254135   | 35.3542477     | VWF;PPBP                                     |
| Prostanoid ligand receptors                                                  | 1/9     | 0.024484 | 0.196055         | 0           | 0                    | 46.15046   | 171.205697     | PTGER3                                       |
| MAP kinase pathway regulation through dual specificity phosphatases          | 1/9     | 0.024484 | 0.196055         | 0           | 0                    | 46.15046   | 171.205697     | DUSP1                                        |
| Activation of the AP-1 family of transcription factors                       | 1/10    | 0.027168 | 0.196055         | 0           | 0                    | 41.02058   | 147.908479     | FOS                                          |
| Glycoprotein 1b-IX-V activation signaling                                    | 1/10    | 0.027168 | 0.196055         | 0           | 0                    | 41.02058   | 147.908479     | VWF                                          |
| Attenuation of GPCR signaling                                                | 1/11    | 0.029845 | 0.196055         | 0           | 0                    | 36.91667   | 129.642094     | GRK4                                         |
| TGF-beta signaling in gastrointestinal stem cells                            | 1/11    | 0.029845 | 0.196055         | 0           | 0                    | 36.91667   | 129.642094     | ACVRL1                                       |
| Transport of organic anions                                                  | 1/11    | 0.029845 | 0.196055         | 0           | 0                    | 36.91667   | 129.642094     | SLCO3A1                                      |
| ERBB1 downstream pathway                                                     | 2/106   | 0.034441 | 0.196055         | 0           | 0                    | 7.199202   | 24.2504942     | DUSP1;FOS                                    |
| Platelet adhesion to exposed collagen                                        | 1/13    | 0.035176 | 0.196055         | 0           | 0                    | 30.7608    | 102.968257     | VWF                                          |
| Organic anion transporters                                                   | 1/13    | 0.035176 | 0.196055         | 0           | 0                    | 30.7608    | 102.968257     | SLC22A7                                      |
| Organic cation/anion/zwitterion transport                                    | 1/13    | 0.035176 | 0.196055         | 0           | 0                    | 30.7608    | 102.968257     | SLC22A7                                      |
| G alpha i pathway                                                            | 2/108   | 0.035636 | 0.196055         | 0           | 0                    | 7.062656   | 23.5497447     | RGS1;GRK4                                    |
| Leptin influence on immune response                                          | 2/110   | 0.036846 | 0.196055         | 0           | 0                    | 6.931167   | 22.8797863     | FOS;PPBP                                     |
| Interleukin-4 regulation of apoptosis                                        | 3/267   | 0.037114 | 0.196055         | 0           | 0                    | 4.300918   | 14.1662417     | S1PR1;FOS;CCDC71                             |
| T cell receptor/Ras pathway                                                  | 1/14    | 0.037831 | 0.196055         | 0           | 0                    | 28.39316   | 92.9768536     | FOS                                          |
| Repression of pain sensation by the transcriptional regulator DREAM          | 1/15    | 0.040479 | 0.196055         | 0           | 0                    | 26.36376   | 84.5478253     | FOS                                          |
| Calcium signaling by HBx of hepatitis B virus                                | 1/15    | 0.040479 | 0.196055         | 0           | 0                    | 26.36376   | 84.5478253     | FOS                                          |
| Coagulation intrinsic pathway                                                | 1/15    | 0.040479 | 0.196055         | 0           | 0                    | 26.36376   | 84.5478253     | VWF                                          |
| Eicosanoid ligand-binding G-protein coupled receptors                        | 1/15    | 0.040479 | 0.196055         | 0           | 0                    | 26.36376   | 84.5478253     | PTGER3                                       |
| Erythrocyte differentiation pathway                                          | 1/15    | 0.040479 | 0.196055         | 0           | 0                    | 26.36376   | 84.5478253     | FLT3                                         |
| Amino acid biosynthesis and interconversion (transamination)                 | 1/16    | 0.04312  | 0.196055         | 0           | 0                    | 24.60494   | 77.35242       | PSPH                                         |
| B cell survival pathway                                                      | 1/16    | 0.04312  | 0.196055         | 0           | 0                    | 24.60494   | 77.35242       | FOS                                          |
| Selenium metabolism and selenoproteins                                       | 1/16    | 0.04312  | 0.196055         | 0           | 0                    | 24.60494   | 77.35242       | FOS                                          |
| CD40L signaling pathway                                                      | 1/16    | 0.04312  | 0.196055         | 0           | 0                    | 24.60494   | 77.35242       | DUSP1                                        |
| Other semaphorin interactions                                                | 1/16    | 0.04312  | 0.196055         | 0           | 0                    | 24.60494   | 77.35242       | SEMA3E                                       |
| G alpha s pathway                                                            | 2/120   | 0.043131 | 0.196055         | 0           | 0                    | 6.340582   | 19.9317377     | RGS1;GRK4                                    |
| GRB2-SOS provides linkage to MAPK signaling for integrins                    | 1/17    | 0.045753 | 0.196055         | 0           | 0                    | 23.06597   | 71.1468518     | VWF                                          |
| Renin-angiotensin system                                                     | 1/17    | 0.045753 | 0.196055         | 0           | 0                    | 23.06597   | 71.1468518     | ENPEP                                        |
| Cadmium-induced DNA biosynthesis and proliferation in macrophages            | 1/17    | 0.045753 | 0.196055         | 0           | 0                    | 23.06597   | 71.1468518     | FOS                                          |
| Interleukin-1 signaling pathway                                              | 2/125   | 0.046413 | 0.196055         | 0           | 0                    | 6.081301   | 18.6706762     | DUSP1;FOS                                    |
| Pertussis toxin-insensitive CCR5 signaling in macrophage                     | 1/18    | 0.04838  | 0.196055         | 0           | 0                    | 21.70806   | 65.7467123     | FOS                                          |
| Bone remodeling                                                              | 1/18    | 0.04838  | 0.196055         | 0           | 0                    | 21.70806   | 65.7467123     | FOS                                          |
| TNFR2 signaling pathway                                                      | 1/18    | 0.04838  | 0.196055         | 0           | 0                    | 21.70806   | 65.7467123     | DUSP1                                        |
| Effect of METS on macrophage differentiation                                 | 1/18    | 0.04838  | 0.196055         | 0           | 0                    | 21.70806   | 65.7467123     | FOS                                          |
| PDGFB signaling pathway                                                      | 2/129   | 0.049103 | 0.196055         | 0           | 0                    | 5.888575   | 17.7471999     | S1PR1;FOS                                    |
